# Supplementary material for: Multiplexed CRISPR/Cas9 Targeting of Genes Implicated in Retinal Regeneration and Degeneration
Source: PubMed Central journal article supplement (PMC6111214; doi:10.3389/fcell.2018.00088), 2018-08-21
Supplement: Image_3.pdf [file Image_3.pdf]

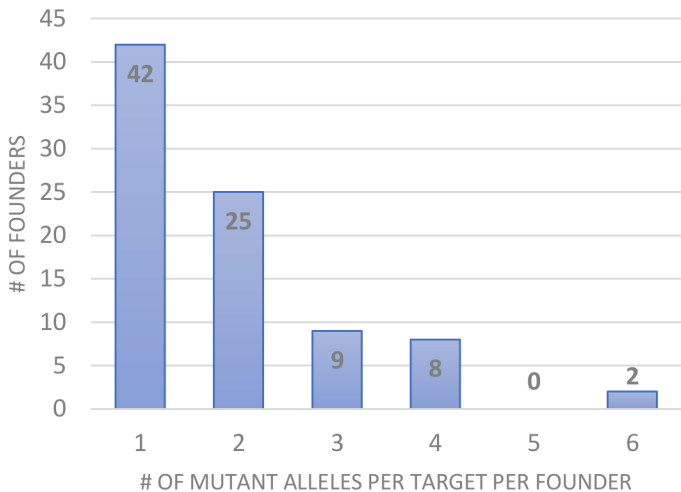

**Supplemental Figure 3:** Numbers of mutant alleles per assayed target seen in F1 progeny of founders. A minimum of 4 potential mutant larvae were assayed for each founder. Data only differentiates alleles based on size reported by capillary electrophoresis of fluorescent PCR amplicons and not actual sequence identity.
