# Supplementary material for: Multiplexed CRISPR/Cas9 Targeting of Genes Implicated in Retinal Regeneration and Degeneration
Source: PubMed Central journal article supplement (PMC6111214; doi:10.3389/fcell.2018.00088), 2018-08-21
Supplement: Image_4.pdf [file Image_4.pdf]

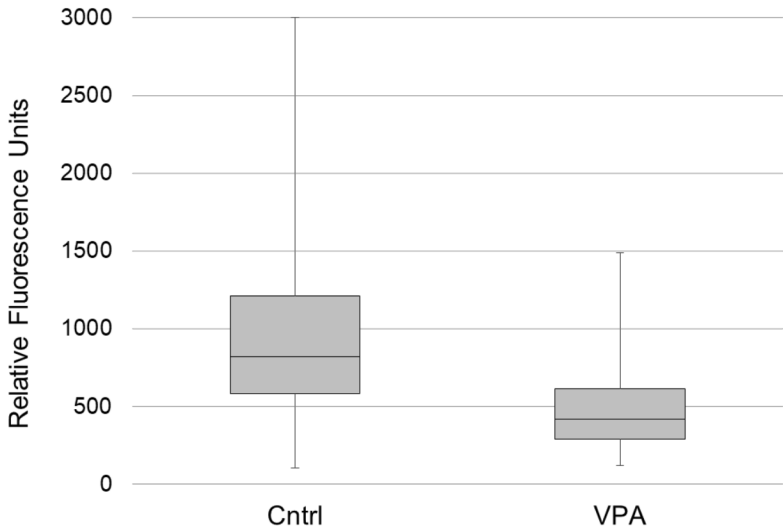

**Supplemental Figure 4:** Chemical inhibition of rod cell regeneration kinetics detected by ARQiv assay. Quantification of YFP signal intensity 3 days after induction of Mtz-mediated rod cell loss demonstrates valproic acid (VPA) treatment inhibition of rod cell regeneration kinetics. Control fish (Ctrl) subjected solely to rod cell loss have regenerated to ~50% of non-ablated YFP fluorescence levels by this time point. Conversely, VPA-treated larvae recover only ~25% of fluorescence.
